# Supplementary material for: Highly enhanced cationic dye adsorption from water by nitro-functionalized Zn-MOF nano/microparticles and a biomolecular binder for improving the reusability
Source: Royal Society of Chemistry journal article supplement (doi:10.1039/d4ce00131a), 2024-01-01
Supplement: d4ce00131a1.pdf [file d4ce00131a1.pdf]

### Electronic Supplementary Information (ESI)

#### Highly enhanced cationic dye adsorption from water by nitro-functionalized Zn-MOF nano/microparticles and biomolecular binder for improving the reusability

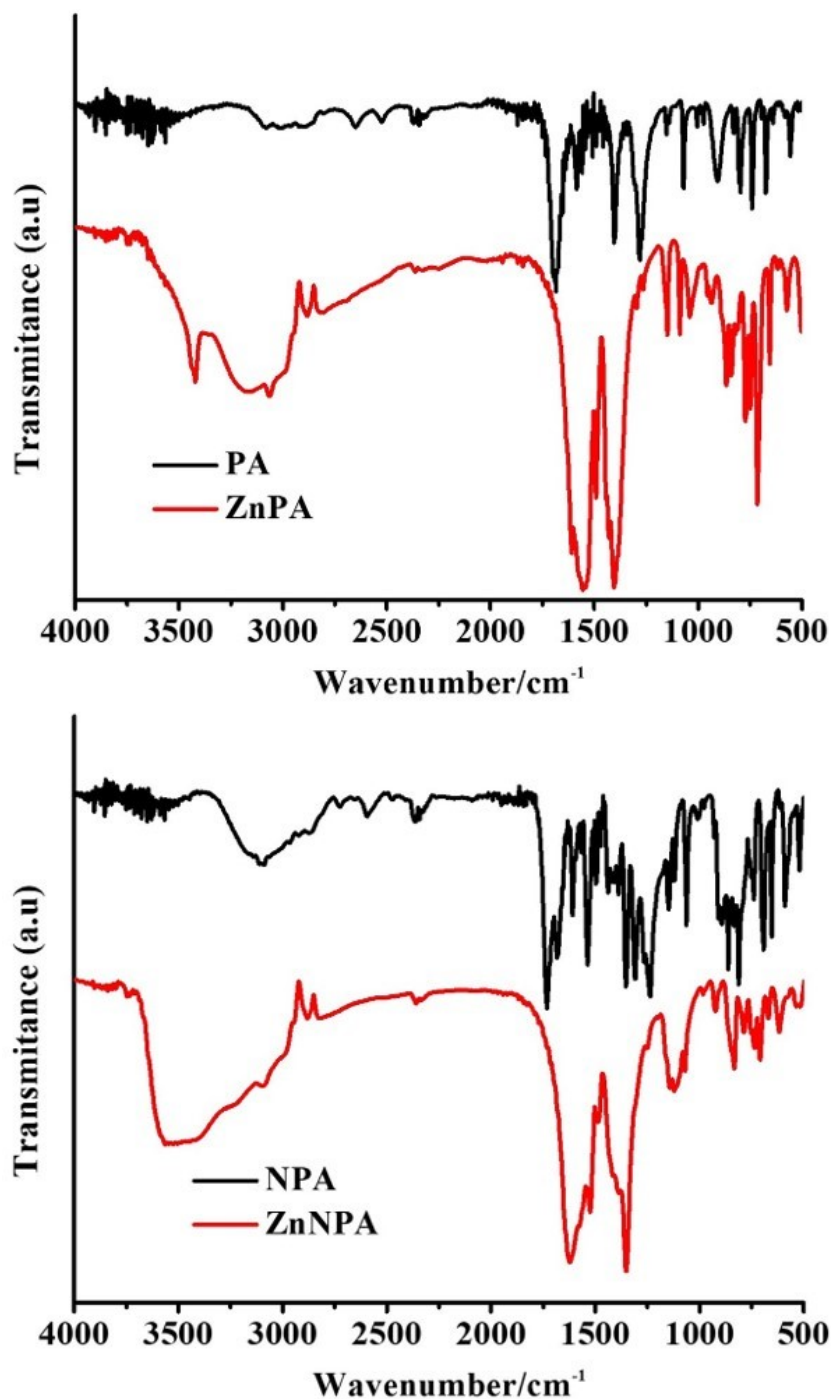

Figure S1. Comparing FTIR spectra of phthalic acid (PA) and nitrophthalic acid (NPA) ligands with corresponding Zn-MOFs nano/microparticles.

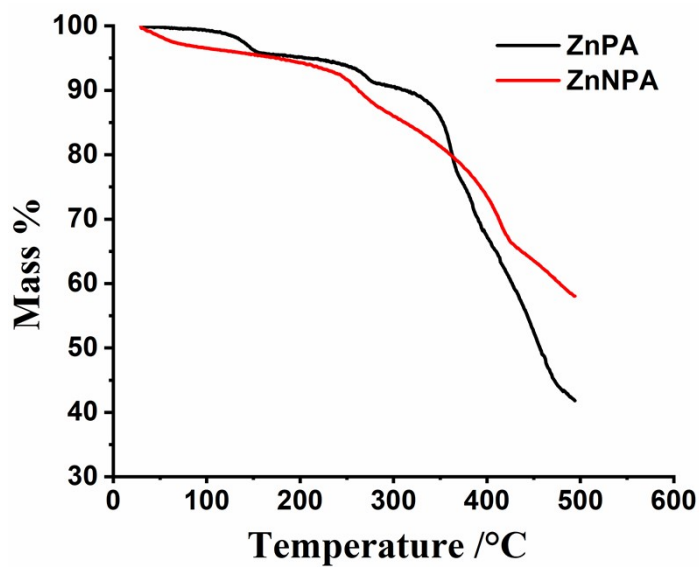

Figure S2. TGA of ZnPA and ZnNPA MOFs.

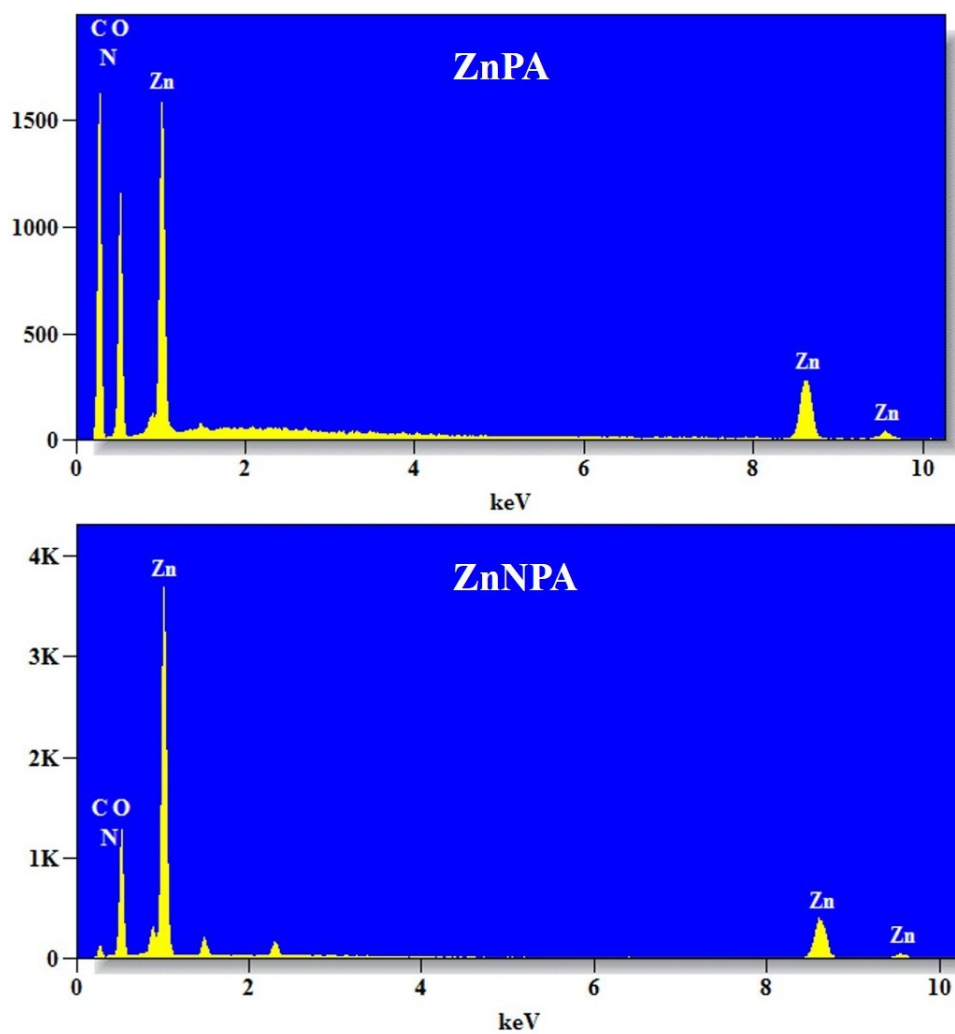

Figure S3. EDX of ZnPA and ZnNPA MOFs.

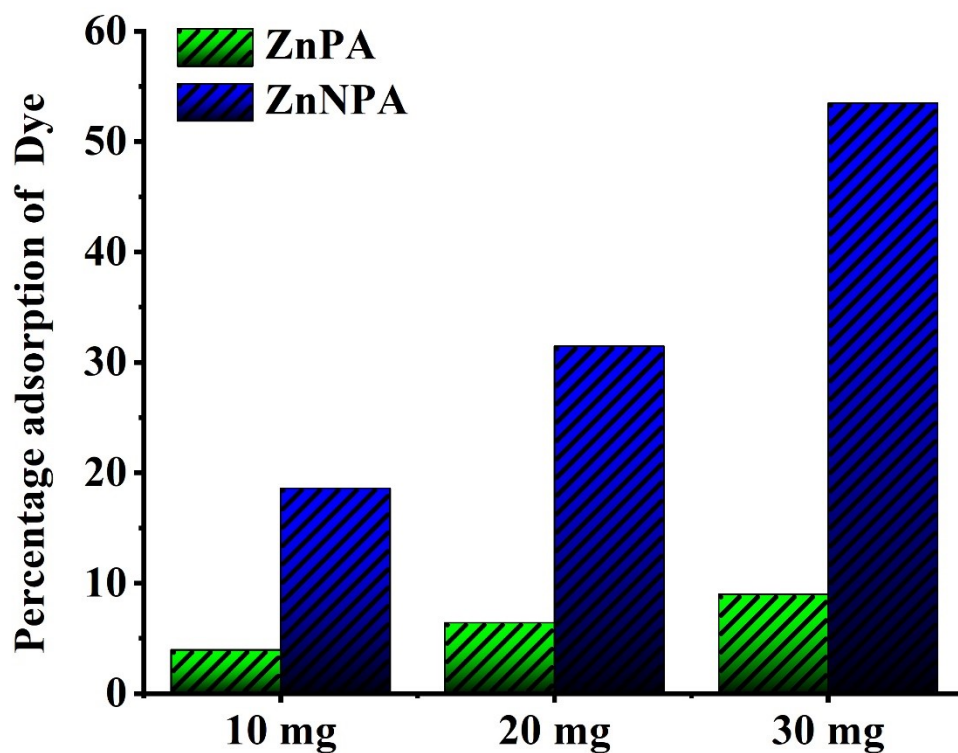

Figure S4. Rh B dye ( $2 \times 10^{-5}$  M) adsorption using different amount of ZnPA and ZnNPA adsorbents.

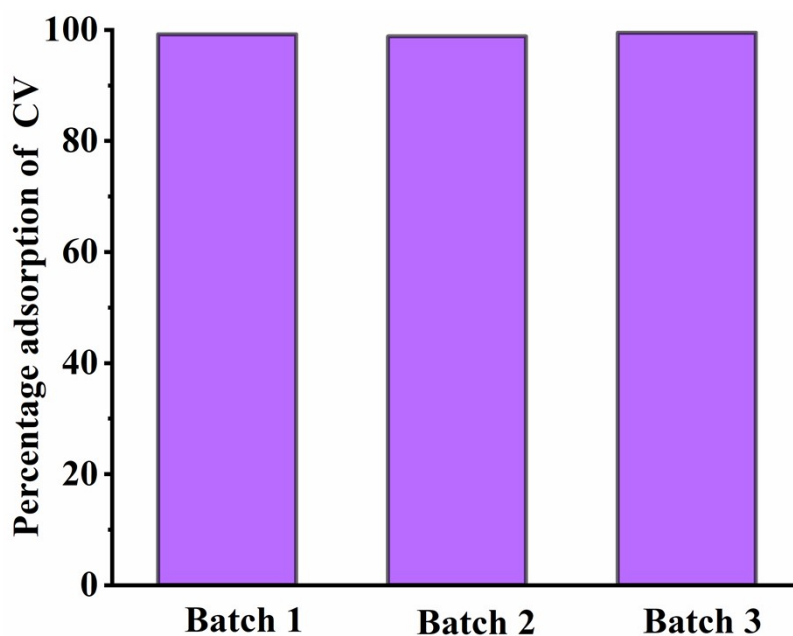

Figure S5. CV dye adsorption of ZnNPA MOF nano/microparticles prepared in three different batches.

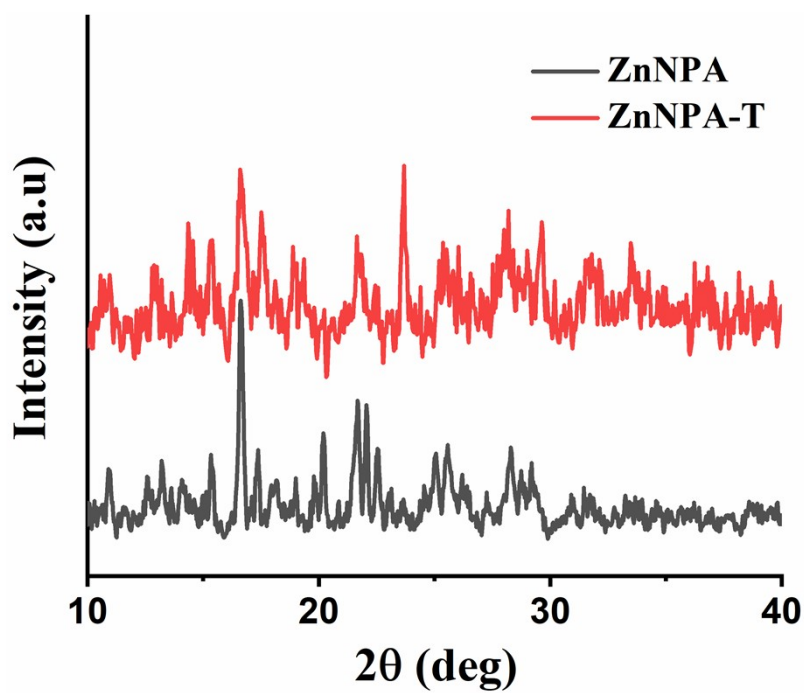

Figure S6. Comparison of PXRD patterns of ZnNPA before and after dipping in tea extract.

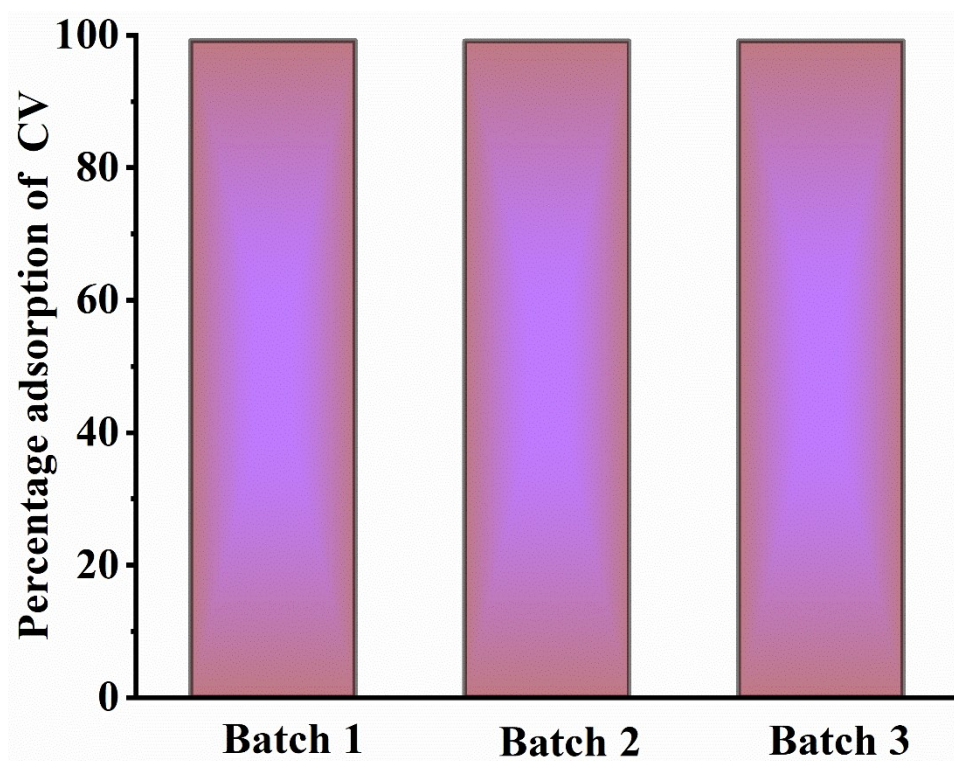

Figure S7. CV dye adsorption of ZnNPA-T MOF nano/microparticles prepared in three different batches.

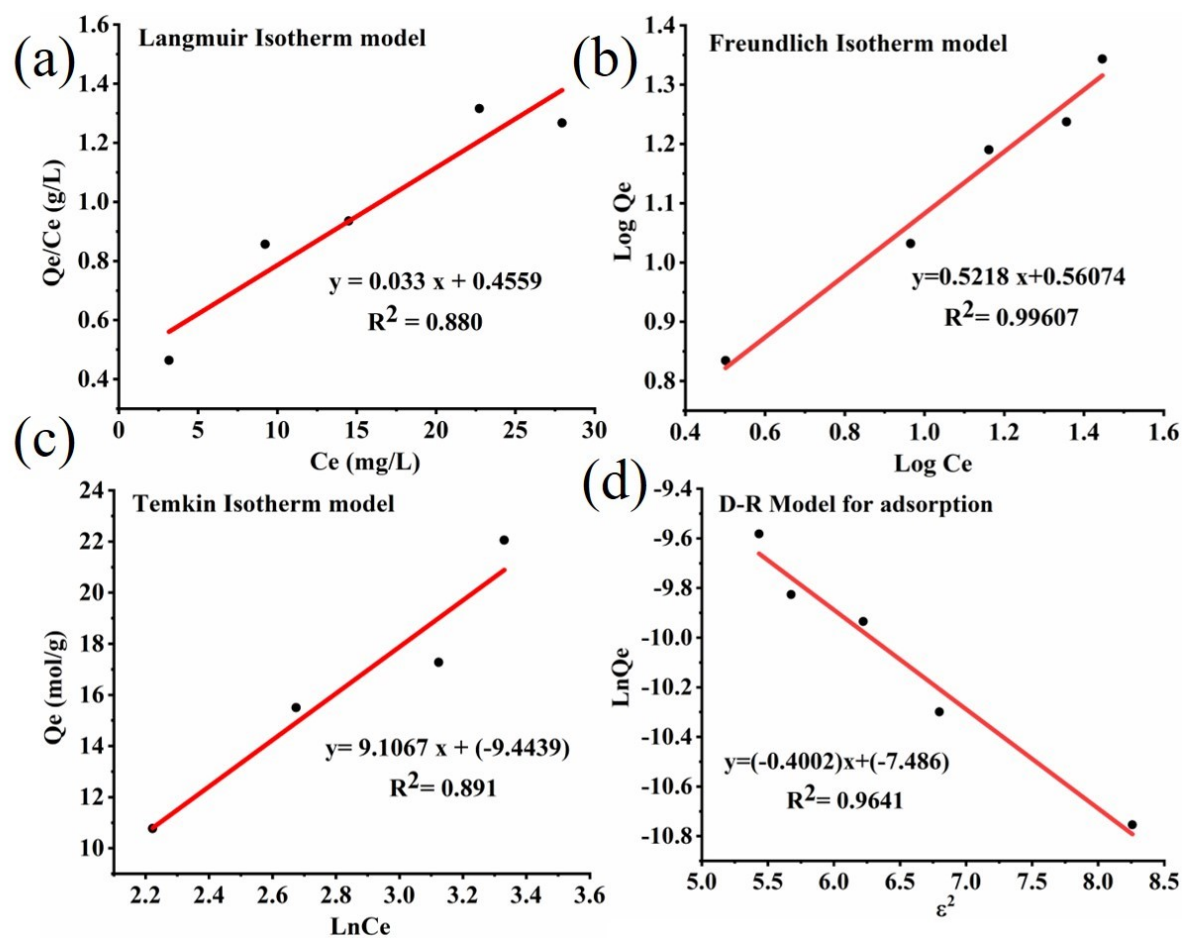

Figure S8. Adsorption isotherm for MB adsorption onto the ZnNPA, (a) Langmuir (b) Freundlich (c) Temkin and (d) Dubinin – Radushkevich models fitting.
